# Supplementary material
Source: Springer Nature journal article supplement (https://www.springermedizin.de/resource/supplementary/12943_2013_1493_MOESM5_ESM.pdf/9552702)
Supplement: MOESM5 [file 9552702]

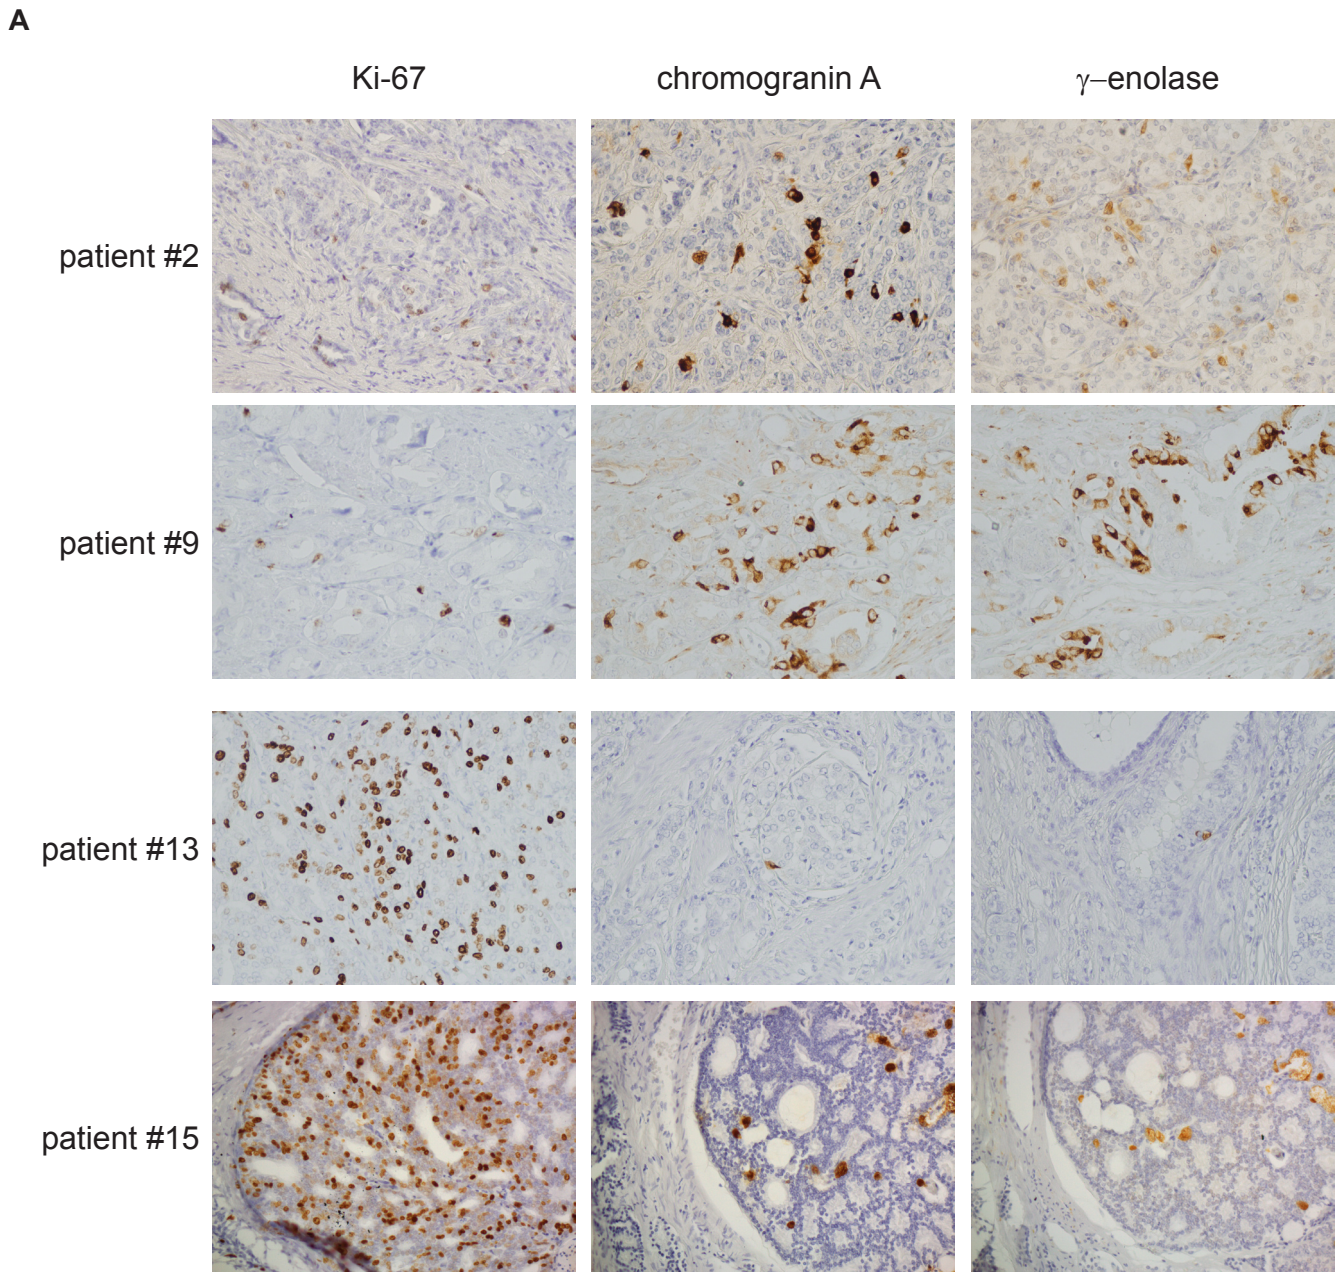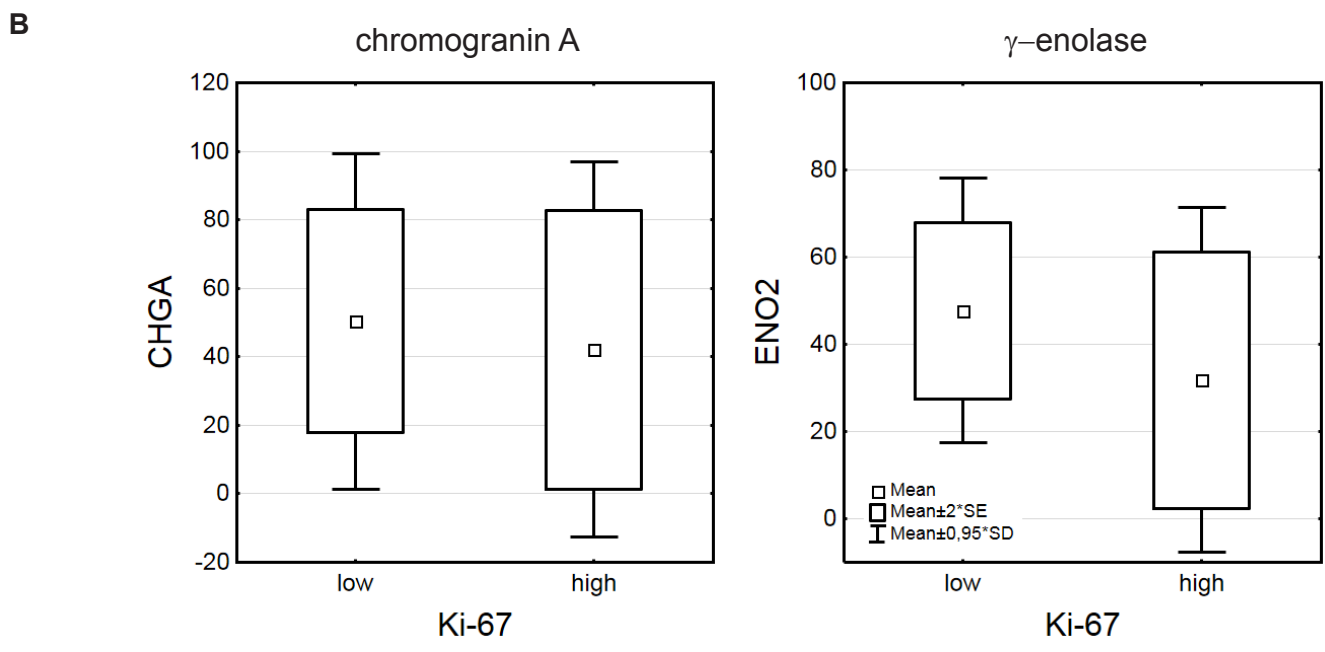

Supplementary Figure 4
